## 1       **Sorting liposomes of distinct sizes by DNA-brick assisted centrifugation**

2       Yang Yang<sup>1,2,3</sup>, Zhenyong Wu<sup>2,4</sup>, Laurie Wang<sup>1</sup>, Kaifeng Zhou<sup>5</sup>, Kai Xia<sup>6,7</sup>, Qiancheng Xiong<sup>1,2</sup>,  
3       Yong Xiong<sup>5</sup>, Thomas J Melia<sup>1</sup>, Erdem Karatekin<sup>2,4,8</sup>, Hongzhou Gu<sup>6,7\*</sup> and Chenxiang Lin<sup>1,2\*</sup>

4       <sup>1</sup>Department of Cell Biology, Yale University School of Medicine

5       <sup>2</sup>Nanobiology Institute, Yale University

6       <sup>3</sup>Institute of Molecular Medicine, Renji Hospital, School of Medicine, Shanghai Jiao Tong  
7       University

8       <sup>4</sup>Department of Cellular and Molecular Physiology, Yale University School of Medicine

9       <sup>5</sup>Department of Molecular Biophysics and Biochemistry, Yale University

10      <sup>6</sup>Institutes of Biomedical Sciences, Fudan University

11      <sup>7</sup>Shanghai Institute of Cardiovascular Diseases, Zhongshan Hospital, Fudan University

12      <sup>8</sup>Saints-Pères Paris Institute for the Neurosciences (SPPIN), Centre National de la Recherche  
13      Scientifique (CNRS) UMR 8003, Université de Paris, Paris, France.

14      \*Correspondence to: [hongzhou.gu@fudan.edu.cn](mailto:hongzhou.gu@fudan.edu.cn) and [chenxiang.lin@yale.edu](mailto:chenxiang.lin@yale.edu)

### 15      **Abstract**

16      The “tiny bubbles of fluid” wrapped by lipid-bilayer membranes, termed vesicles, are abundant in  
17      cells and extracellular space, performing critical tasks including nutrient uptake, cargo transport,  
18      and waste confinement. Vesicles on different missions and transport routes are often distinct both  
19      in size and in chemical composition, which confers specificity to their interactions with other  
20      membranous compartments. Therefore, to accurately recapitulate the vesicles’ structure and  
21      behavior, it is important to use homogeneous liposomes (vesicles made of synthetic components)  
22      with precisely defined attributes as model membranes. Although existing methods can generate  
23      liposomes of selected sizes with reasonable homogeneity, the scalable production of uniformly-  
24      sized liposomes across a wide range of dimensions and compositions remains challenging. Here  
25      we report a streamlined, high-throughput sorting technique that uses cholesterol-modified  
26      “nanobricks” made of a few DNA oligonucleotides to differentiate hetero-sized liposomes by their  
27      buoyant densities. After DNA-brick coating, milligrams of liposomes of different origins (e.g.,  
28      produced via extrusion or sonication, and reconstituted with membrane proteins) can be  
29      separated by centrifugation into six to eight homogeneous populations with mean diameters from  
30      30 to 130 nm. In proof of concept experiments, we show that these uniform, leak-free liposomes  
31      are ideal substrates to study, with an unprecedented resolution, how membrane curvature  
32      influences the activity of peripheral (ATG3) and integral (SNARE) membrane proteins. We  
33      anticipate that our sorting technique will facilitate the quantitative understanding of membrane  
34      curvature in vesicular transport. Furthermore, adding a facile and standardized separation step to  
35      the conventional liposome preparation pipeline may benefit the formulation and prototyping of  
36      liposomal drug-carrying vehicles.

37 Classical methods for controlling liposome size rely on liposome formation conditions<sup>1-3</sup> (e.g., lipid  
38 composition and solvent-to-water mixing ratio) as well as post-formation homogenization<sup>4,5</sup> (e.g.,  
39 extrusion and sonication) and purification<sup>6,7</sup> (e.g., centrifugation and size-exclusion  
40 chromatography). The production outcome is tied to a set of empirically determined parameters  
41 that may not be independently tunable, thus limiting users' ability to selectively vary the liposome  
42 size and composition. Microfluidic-based systems provide a way to tune liposome size and  
43 dispersity, but often require nonstandard devices built in-house<sup>8,9</sup>. Additionally, the capability of  
44 microfluidic-basic methods to make functional proteoliposomes is yet to be examined. Another  
45 promising approach is to guide lipid-bilayer self-assembly by DNA nanotemplates<sup>10-12</sup>. While  
46 effective in forming size-controlled liposomes with programmable membrane-protein  
47 stoichiometry, this approach is cost-ineffective for mass production due to the requirement of a  
48 unique DNA template for each liposome configuration and the relatively low lipid recovery.  
49 Moreover, the use of detergent limits the selection of compatible cargo molecules.

50 To overcome these problems, here we devise a liposome sorting strategy (**Fig. 1a**) that can be  
51 used in conjunction with an assortment of liposome manufacturing methods. Although typical lipid  
52 bilayers are lighter than aqueous solutions, liposomes that are different in size but identical in  
53 membrane and internal contents differ only slightly in buoyant density, because a liposome's  
54 aqueous lumen constitutes the bulk of its mass. However, the surface-area-to-volume ratio (S/V)  
55 of a spherical liposome decreases rapidly with increasing size (i.e., S/V is inversely proportional  
56 to radius), affording the opportunity to amplify the buoyant density difference among liposomes  
57 by ubiquitously coating them with a dense material (similar to attaching bricks to helium balloons).  
58 In theory, smaller liposomes will gain more density than larger ones when coated by such  
59 molecular bricks (**Fig. 1b**), allowing liposome separation by isopycnic centrifugation.

60 We chose DNA as the coating material for its high buoyant density (~1.7 g/mL in CsCl medium)<sup>13</sup>,  
61 excellent solubility, programmable self-assembly behaviors<sup>14</sup>, and easiness to conjugate with  
62 hydrophobic molecules<sup>15</sup>. Previously, designer DNA nanostructures bearing hydrophobic  
63 moieties have shown promise in functionalizing and deforming liposomes<sup>16-18</sup>. In this work, we  
64 built two DNA structures (**Fig. 1a** and **Fig. S1**), a three-pointed star<sup>19</sup> (~86 kD) and a six-helix-  
65 bundle rod<sup>20</sup> (~189 kD), with a single cholesterol at the end of each DNA structure as the  
66 membrane anchor. Placing only one hydrophobic molecule per structure minimizes the brick's  
67 footprint on the liposome surface and limits aggregation and membrane deformation. To facilitate  
68 analysis, we labeled ~10% of DNA bricks with Cy5 fluorophore. After assembling the cholesterol-  
69 modified DNA bricks by thermal annealing and purifying them by rate-zonal centrifugation (**Fig.**

70 **S2**), we incubated them with a mixture of extruded and sonicated liposomes (59.2% DOPC, 30%  
71 DOPE, 10% DOPS, and 0.8% rhodamine-DOPE, see Supplementary Materials) at the brick:lipid  
72 molar ratio of 1:375. Centrifuging these DNA-coated liposomes in a gradient of isosmotic density  
73 medium (0%–22.5% iodixanol, ~5 mL per tube) at a maximum of ~300k-rcf for 4.5 hours spread  
74 the liposomes into a smeared band spanning the central two-thirds of the gradient. Analyzing the  
75 gradient fractions (~200  $\mu$ L each, named F1–F24 from top to bottom) by SDS-Agarose gel  
76 electrophoresis confirmed the coexistence of DNA bricks and liposomes in the middle portion of  
77 the gradient, and revealed free DNA bricks at the very bottom, suggesting the bricks may have  
78 saturated the surface of liposomes (**Fig. S3**). Negative-stain transmission electron microscopy  
79 (TEM) study showed that F6–F18 each contained uniform-size liposomes with coefficient of  
80 variation less than 15% (**Fig. 1c** and **Fig. S4**), on par with the size homogeneity achieved through  
81 DNA-template guided lipid self-assembly. This finding was corroborated by cryo-electron  
82 microscopy (cryo-EM), which further showed 77% of liposomes as unilamellar (**Fig. S5**). The  
83 multi-lamellar liposomes were most likely generated when extruding liposomes through filters with  
84 200-nm pores<sup>4</sup> before sorting. Importantly, the recovered fractions contained liposomes with  
85 quasi-continuous mean diameters in the range of 30–130 nm (larger liposomes found in lighter  
86 fractions), allowing us to select or bin any fractions for particular liposome sizes needed in  
87 downstream applications. By and large, coating liposomes with the two types of DNA bricks  
88 yielded comparable separation resolutions, while uncoated liposomes remained inseparable after  
89 centrifugation (**Fig. 1c** and **Fig. S6**). The heavier rod-shaped brick performed better when used  
90 to sort the >100-nm liposomes and the three-pointed-star brick led to a finer separation of  
91 liposomes smaller than 40 nm. The separation resolution and recovery yield (typically >90%) were  
92 consistent from batch to batch, at different separation scales (11  $\mu$ g – 1.3 mg), and across a  
93 spectrum of lipid compositions, as long as the liposome surface was not overcrowded with  
94 polyethylene glycol (**Fig. S7–S8**). Additionally, the dense layer of DNA bricks (clearly visible by  
95 electron microscopy in the case of six-helix bundle rods) prolonged the shelf life of sorted  
96 liposomes (up to 20 weeks at room temperature, **Fig. S9**) and was readily removable by DNase  
97 I digestion (**Fig. S10**).

98 The well-maintained monodispersity after long-term storage and the clear, intact boundaries  
99 observed by cryo-EM were promising signs of membrane integrity of sorted liposomes. To confirm  
100 this, we used 6-helix-bundle bricks to assist the sorting of extruded liposomes (a 1:1 mixture of  
101 liposomes passed through filters with 200-nm and 50-nm pores) loaded with fluorescein-labeled  
102 class I deoxyribozymes (I-R1a), which self-cleave in minutes upon exposure to ~1 mM Zn<sup>2+</sup> at

103 near-neutral pH (**Fig. 2a**)<sup>21</sup>. Similar to the plain liposomes, most deoxyribozyme-loaded liposomes  
104 with DNA-brick coatings were sorted into six homogeneous populations with mean diameters from  
105 64 to 129 nm (**Fig. 2b** and **Fig. S11**, few smaller liposomes recovered due to their scarcity in the  
106 extruded liposomes). The narrow size distribution of each sorted fraction contrasts with the  
107 heterogeneous populations generated by filter-driven homogenization (**Fig. S7**), again  
108 highlighting the effectiveness and necessity of DNA-assisted sorting. The molar ratio between  
109 lipid and deoxyribozyme (determined by the fluorescence of rhodamine and fluorescein) was  
110 inversely proportional to liposome diameter, as expected from S/V of a sphere, indicating the  
111 unbiased cargo load in all sizes of liposome (**Fig. 2c**). Moreover, the liposomes, sorted or not,  
112 were impermeable to Zn<sup>2+</sup> (2 mM) and deoxyribozyme (1 μM), showing no detectable I-R1a self-  
113 cleavage when incubated with Zn<sup>2+</sup>-containing solutions for over 12 hours, until we lysed  
114 liposomes with detergent (1% octyl β-D-glucopyranoside).

115 In cells, membranes are shaped into various curvatures that localize biochemical reactions and  
116 modulate membrane remodeling. Liposomes with a fine gradient of sizes provide an ideal platform  
117 to study such curvature-dependent activities *in vitro* in a systematic and precise manner. Here we  
118 applied the liposome size sorting technique to revamp two classical assays, highlighting the  
119 benefit of using uniform-size liposomes for the experimental modeling of lipid biochemistry and  
120 membrane dynamics.

121 We first studied the curvature-sensing capability of a conjugating enzyme that works on the  
122 membrane surface of the autophagosome. As the autophagosome grows, GABARAP-L1 (GL1)  
123 and its homologs become covalently attached to phosphatidylethanolamine lipids on the  
124 membrane surface through the serial actions of the ATG7 and ATG3 enzymes<sup>22</sup>. ATG3 catalyzes  
125 the final step in this cascade and its activity depends upon an amphipathic helix that senses lipid  
126 packing defects in highly curved membranes, suggesting that this protein may specifically target  
127 the rim of the cup-shaped autophagosome as a unique intracellular morphology. Previous *in vitro*  
128 studies revealed a curvature dependence of ATG3 activity (higher activities with 30 nm diameter  
129 liposomes than 800 nm ones)<sup>23</sup>, but with extruded liposome preparations and/or sonication, it was  
130 not possible to collect curvature sensing information across the biologically relevant range of 25–  
131 60 nm, where vesicles, tubules and the autophagic rim are found. Using sorted liposomes (59.2%  
132 DOPC, 30% DOPE, 10% DOPS, and 0.8% rhodamine-DOPE) of eight selected sizes (mean  
133 diameter: 30, 40, 55, 77, 90, 98, 105, and 122 nm) for ATG3-catalyzed reactions, we confirmed  
134 that the lipidation of GL1 in general favored smaller liposomes possessing higher curvature.  
135 Specifically, our data revealed a circa 5× enrichment of GL1-PE conjugates in liposomes that are

136 30–55 nm in diameter comparing to larger liposomes, with the lipidation peaking on liposomes  
137 with ~40-nm diameter (**Fig. 3** and **Fig. S12–S13**). This curvature range is reminiscent of the  
138 typical autophagosome rim (20–50 nm lamellar spacing)<sup>22</sup>, the inferred hotspot of ATG3-  
139 dependent lipidation *in vivo*. As ATG3 is a peripheral protein, it must gain access to the membrane  
140 surface, and thus a potential concern of using sorted liposomes is that the DNA bricks might  
141 directly impede lipidation. Though the DNA bricks are essentially inert with respect to protein  
142 activity, we assured that the membrane surface was not obscured by treating the sorted  
143 liposomes with nuclease before the lipidation assay. Overall, homogeneous liposomes improved  
144 the precision of the *in vitro* lipidation assay, enabling a quantitative measurement of the curvature-  
145 dependent ATG3/ATG7 ligation cascade.

146 We next turned our attention to how DNA-brick mediated sorting might work with transmembrane  
147 proteins. Soluble NSF attachment protein receptors (SNAREs) are a family of proteins that fuel  
148 membrane fusion in many intracellular trafficking routes, including the vesicular release of  
149 neurotransmitters and hormones<sup>24–26</sup>. Two types of SNAREs, v-SNAREs on the vesicle and t-  
150 SNAREs on the target membrane, assemble into a four-helical complex to force the membranes  
151 into proximity and eventually drive fusion. Previous experimental<sup>27,28</sup> and theoretical<sup>29</sup> work  
152 suggests that membrane curvature may be a critical factor in determining the kinetics of fusion  
153 and the number of SNARE complexes required. However, past experiments measured the fusion  
154 rates of proteoliposomes with only one or two sizes, due to constraints in preparation of protein-  
155 reconstituted liposomes<sup>27,28,30</sup>. In addition, the preparation methods often produce liposomes with  
156 broad size distributions<sup>31</sup>. These limitations prevented systematic studies of the curvature  
157 dependence of fusion rates. Thus, it is highly desirable to develop methods that can produce  
158 proteoliposomes with sharp size distributions.

159 In previous work, we addressed this issue by building DNA-ring templated liposomes displaying  
160 a predetermined number of SNARE proteins<sup>32</sup>. Despite the uniform and controllable  
161 proteoliposome size, an exhaustive examination of the impact of membrane curvature on fusion  
162 rate was impractical, because the obligated redesign of DNA templates for each liposome size  
163 and the small preparation scale (typically less than a few micrograms) limited the throughput of  
164 our fusion assay. To address this challenge, here we applied DNA-brick assisted size-sorting to  
165 produce proteoliposomes with well-defined sizes. We reconstituted the neuronal/exocytotic v-  
166 SNARE VAMP2 into liposomes (lipid:VAMP2  $\approx$  200:1) containing FRET-dye-labeled lipids (NBD-  
167 and rhodamine-DOPE) and performed DNA-brick assisted sorting on 440  $\mu$ g of such  
168 proteoliposomes. The pre-existence of proteins in vesicle membranes did not compromise the

169 separation effectiveness, as confirmed by negative-stain TEM (**Fig S14**). After enzymatic removal  
170 of DNA bricks (unnecessary in hindsight as the DNA bricks did not affect fusion, see **Fig. S15**),  
171 we mixed VAMP-embedded liposomes of eight different diameters (37–104 nm) with unlabeled  
172 (and unsorted) liposomes carrying cognate t-SNAREs in separate test tubes; the mixtures (lipid  
173 concentration = 3 mM) were kept at 4°C for 2hrs, a temperature that allows vesicle docking but  
174 no fusion (**Fig. S16**). Finally, we warmed the pre-docked liposomes to 37°C and monitored NBD  
175 fluorescence for 2 hours using a fluorescence microplate reader. Merging of liposome membranes  
176 increases the distance between NBD dyes and their rhodamine quenchers, providing a read-out  
177 of lipid mixing kinetics (**Fig. 4a**). Consistent with previous findings<sup>24,27,30</sup>, we showed that the  
178 membrane fusion is SNARE-dependent. However, unlike the conventional assays, our setup  
179 discerned the lipid mixing kinetics as a function of vesicle size (**Fig. 4b**). When mean v-SNARE-  
180 bearing liposome diameters were within 47–104 nm, smaller liposomes fused more rapidly, with  
181 the most and least fusogenic vesicles showing ~3-fold difference in the final NBD fluorescence.  
182 Interestingly, further decreasing liposome diameter to an average of 37 nm slowed fusion  
183 moderately. Assays with halved VAMP2 density on liposomes yielded a similar trend (**Fig. 4c** and  
184 **4d**). We note that when lipid:VAMP2 ratios were held constant, smaller liposomes tended to  
185 display fewer v-SNAREs, which may explain the slower fusion of the 37-nm liposomes comparing  
186 to the 47-nm ones. That is, there seems to be an optimal combination of SNARE copies per  
187 liposome and membrane curvature — an effect that would not have been captured without the  
188 precise control of liposome sizes.

189 In neurons, synaptic vesicle sizes are highly homogeneous and regulated<sup>33,34</sup>. Here we only  
190 studied the minimal fusion machinery (SNAREs) to prove the concept. However, the platform can  
191 in principle be adapted to model more physiological conditions, where additional proteins (e.g.,  
192 Synaptogamin-1 or Munc18) affect the fate of vesicles.

193 Self-assembled DNA nanostructures have been interfaced with lipid bilayers in a number of  
194 unconventional ways towards the goal of programmable membrane engineering<sup>16-18</sup>. In the past,  
195 this took one of two forms. The first approach is to scaffold liposome formation with DNA templates,  
196 which excels at precision but any pre-existing membrane needs to be micellized before  
197 reassembly<sup>10-12</sup>. The second strategy is to reshape the membrane landscape of liposomes with  
198 DNA devices that oligomerize or reconfigure on command, which may preserve certain pre-  
199 existing membrane features (e.g. lipid composition, internal content) but the end products tend to  
200 be less homogeneous<sup>35-37</sup>. By bridging this gap, the DNA-brick assisted liposome sorting method  
201 further advances the membrane engineering capability of DNA nanotechnology. Specifically, the

202 method separates liposomes from virtually any source into a range of narrowly distributed sizes  
203 with minimal impact on the original membrane properties. Further, two DNA structures composed  
204 of a handful of oligonucleotides fulfilled various sorting tasks. The simplicity and robustness of the  
205 technique make it readily adaptable by any biochemical laboratory with access to research-grade  
206 ultracentrifuges (**Fig. S17**). Future method development will benefit from the programmability of  
207 DNA nanostructures. For example, coating liposomes with more massive DNA bricks could  
208 facilitate the separation of larger liposomes; changing cholesterol anchors to protein-specific  
209 ligands could enable the sorting of natural vesicles by their surface markers. In addition to the  
210 utilities in basic research, we envision the method (in its current or adapted forms) finding  
211 applications in biotechnology, such as in aiding the development of drug-delivering liposomes as  
212 well as isolating disease-specific extracellular vesicles.

### 213 **Acknowledgement**

214 This work is supported by a National Institutes of Health (NIH) Director's New Innovator Award  
215 (GM114830), an NIH grant (GM132114), and a Yale University faculty startup fund to C.L., NIH  
216 grants to T.M. (GM100930 and GM109466) and to E.K. (NS113236), and National Natural  
217 Science Foundation of China grants to H.G. (21673050, 91859104, and 81861138004)

### 218 **Author contributions**

219 Y.Y. initiated the project, designed and performed most of the experiments, analyzed the data,  
220 and prepared the manuscript. Z.W. performed membrane fusion study and analyzed the data.  
221 L.W. performed lipidation study. K.Z. performed cryo-EM study. K.X. replicated the sorting method.  
222 Q.X. performed negative stain TEM study. Y.X. supervised the cryo-EM study and interpreted the  
223 data. T.J.M. designed and supervised the lipidation study and interpreted the data. E.K.  
224 supervised the membrane fusion study and interpreted the data. H.G. designed the liposome  
225 leakage assay, supervised replication of the sorting method, and interpreted the data. C.L.  
226 initiated the project, designed and supervised the study, interpreted the data, and prepared the  
227 manuscript. All authors reviewed and approved the manuscript.

### 228 **Competing financial interests**

229 Authors declare the following competing financial interests: a provisional patent on the DNA-  
230 assisted liposome sorting method has been filed.

231

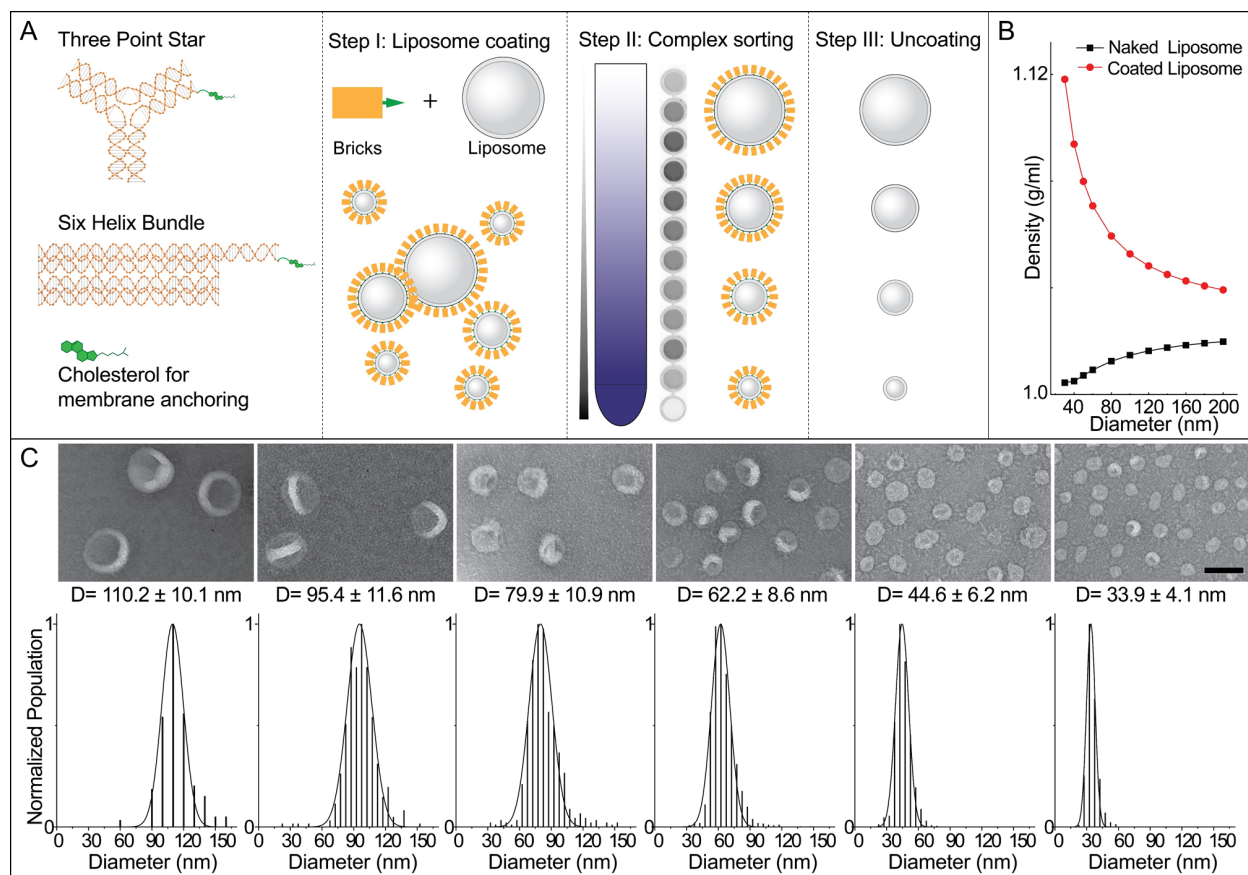

232

233 **Figure 1.** DNA-brick-assisted liposome sorting scheme and results. (A) Schematic diagrams of  
 234 cholesterol-labeled DNA bricks (left) and brick-assisted liposome sorting (right) — liposome  
 235 coating by DNA bricks, separation of DNA-coated liposomes by isopycnic centrifugation, and  
 236 removal of DNA bricks from the sorted liposomes. A monochromatic fluorescence image of 12  
 237 fractions recovered after centrifugation (Step II) shows the spread of liposomes in the density  
 238 gradient. (B) A plot showing buoyant densities of naked and DNA-coated liposomes of various  
 239 sizes. The theoretical values were calculated assuming the buoyant density, footprint, and  
 240 molecular weight of a six-helix bundle DNA brick to be 1.7 g/cm<sup>3</sup>, 189 nm<sup>2</sup> and 189 kD,  
 241 respectively (see Supplementary Information for details), and only meant to illustrate the general  
 242 trends of liposome density versus size in the presence and absence of DNA coating. (C)  
 243 Liposomes sorted into distinct sizes (shown as D=mean±SD) with the help of the six-helix-bundle  
 244 DNA bricks. Representative negative-stain TEM images are shown above the corresponding  
 245 histograms (N=156–1690) fitted by Gaussian functions. Liposomes are made of ~59.2% 1,2-  
 246 dioleoyl-sn-glycero-3-phosphocholine (DOPC), 30% 1,2-dioleoyl-sn-glycero-3-  
 247 phosphoethanolamine (DOPE), 10% 1,2-dioleoyl-sn-glycero-3-phospho-L-serine (DOPS), and  
 248 0.8% 1,2-dioleoyl-sn-glycero-3-phosphoethanolamine-N-(lissamine rhodamine B sulfonyl)  
 249 (rhodamine-DOPE). Scale bar: 100 nm.



250

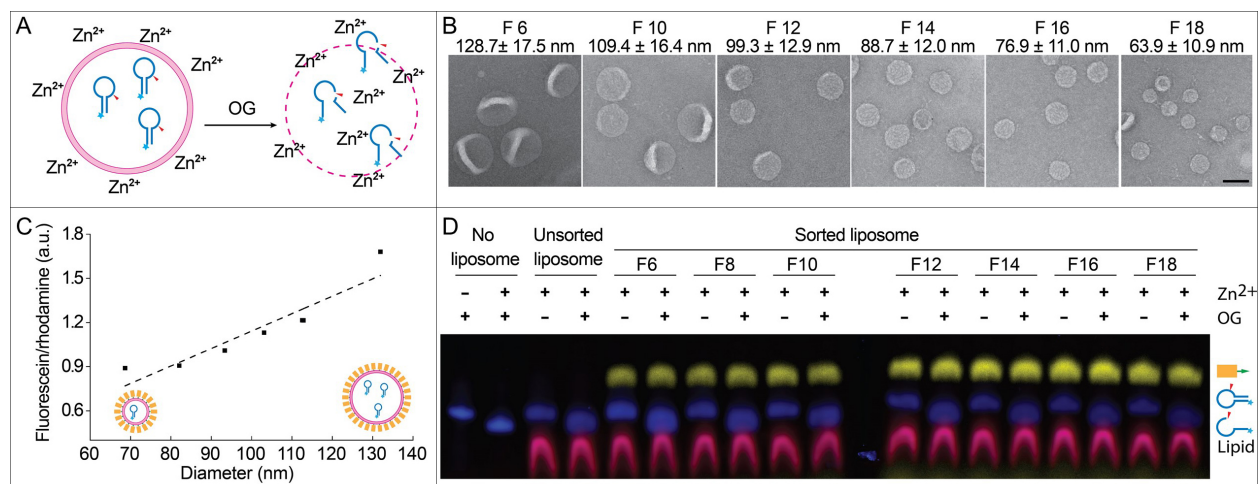

251 **Figure 2.** Sorting liposomes containing self-cleaving deoxyribozymes. (A) A schematic drawing  
 252 of the leakage assay used to assess membrane permeability. Fluorescein-labeled  
 253 deoxyribozymes undergo site-specific hydrolysis when exposed to Zn<sup>2+</sup> outside of the liposomes.  
 254 (B) Representative TEM images of sorted liposomes containing deoxyribozymes. Fraction  
 255 numbers (e.g. F6) and liposome diameters (mean±SD, N=131–621) are noted above the  
 256 corresponding images. Scale bar: 100 nm. (C) A plot showing the lipid-to-deoxyribozyme ratios  
 257 in sorted liposomes fitted via linear regression (dashed line). (D) Permeability of liposomes  
 258 characterized by SDS-PAGE gel electrophoresis following the deoxyribozyme-based leakage  
 259 assay. Pseudo-colors: Cy5 (on DNA bricks) = yellow; fluorescein (on deoxyribozymes) = blue;  
 260 rhodamine (on liposomes) = magenta. Liposomes are made of 59.2% DOPC, 30% DOPE, 10%  
 261 DOPS, and 0.8% rhodamine-DOPE.

262

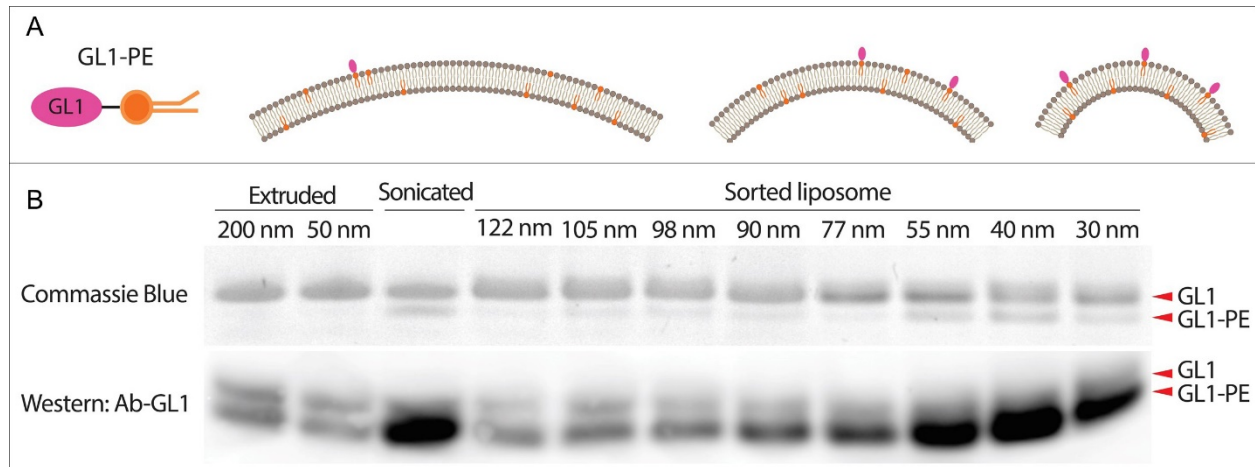

263

264 **Figure 3.** Atg3-catalyzed GL1 lipidation reaction studied using uniform-size liposomes. (A)  
265 Schematic illustrations of GL1-DOPE conjugate (left) and the expected lipidation outcomes on  
266 liposomes with differential membrane curvatures (right). (B) GL1-lipidation efficiencies on  
267 extruded, sonicated and sorted liposomes (59.2% DOPC, 30% DOPE, 10% DOPS, and 0.8%  
268 rhodamine-DOPE) characterized by gel electrophoresis (top row, stained by Coomassie Blue)  
269 and immunoblot against GL1 with an antibody that preferentially recognizes the GL1-PE  
270 conformation (bottom row). The numbers (in nm) above lanes represent the nominal pore size of  
271 the filters (extruded liposomes) or measured mean diameters (sorted liposomes).

272

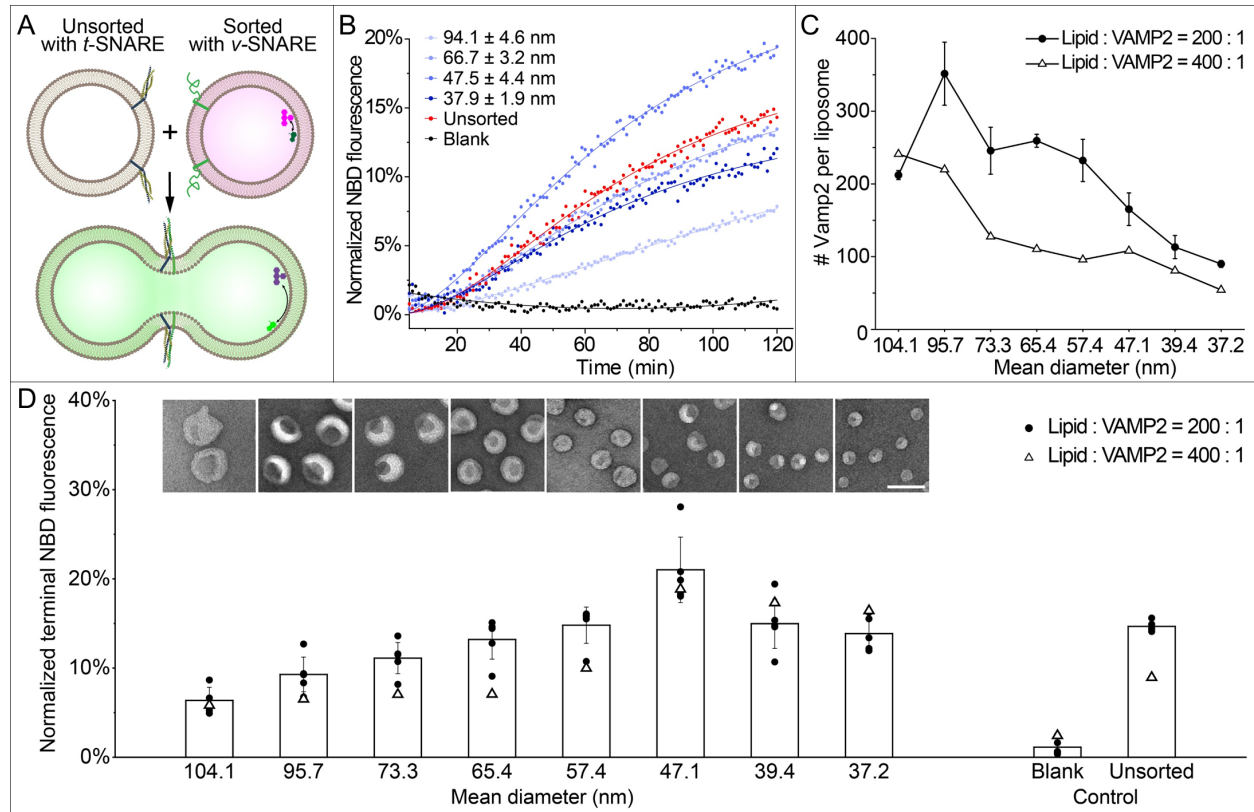

273

274 **Figure 4.** SNARE-mediated membrane fusion studied using uniform-size liposomes. (A) A  
 275 schematic illustration of the lipid-mixing assay used to monitor membrane fusion. Initially  
 276 quenched NBD dyes (green) fluoresce following membrane fusion due to a decrease in FRET  
 277 with rhodamine dyes (magenta). SNARE proteins are shown as blue, yellow (t-SNAREs) and  
 278 green (VAMP2, v-SNARE) ribbons on the membranes. (B) Representative fluorescence traces  
 279 showing the kinetics of fusion between unsorted liposomes bearing t-SNAREs and unsorted (red)  
 280 or sorted (different shades of blue, diameters marked as mean±SD, N>208) liposomes bearing v-  
 281 SNAREs. Protein-free liposomes are mixed with v-SNARE bearing liposomes as a negative  
 282 control (black). Liposomes with v-SNAREs are reconstituted with 82% POPC, 12% DOPS, 1.5%  
 283 Rhodamine-DOPE, 1.5% 1,2-dioleoyl-sn-glycero-3-phosphoethanolamine-N-(7-nitro-2-1,3-  
 284 benzoxadiazol-4-yl) (NBD-DOPE), and a lipid:protein molar ratio of 200:1 or 400:1. Liposomes  
 285 with t-SNAREs are reconstituted with 58% 1-palmitoyl-2-oleoyl-glycero-3-phosphocholine  
 286 (POPC), 25% DOPS, 15% 1-palmitoyl-2-oleoyl-sn-glycero-3-phosphoethanolamine (POPE), 2%  
 287 phosphatidylinositol 4,5-bisphosphate and a lipid:protein molar ratio of 400:1. (C) v-SNARE copy  
 288 numbers per liposome measured from sorted liposomes reconstituted with lipid:VAMP2 molar  
 289 ratios of 200:1 and 400:1. (D) Lipid mixing after 2 hours of fusion reactions (measured by NBD  
 290 fluorescence, as shown in (B)) plotted against the average diameters of sorted v-SNARE-bearing  
 291 liposomes (representative TEM images are shown). Means and SDs are based on the dataset of  
 292 liposomes reconstituted with lipid:VAMP2 = 200:1. Scale bar: 100 nm.

293

294 **References**

- 295 1 Woodle, M. C. & Papahadjopoulos, D. Liposome preparation and size characterization.  
296 *Methods Enzymol* **171**, 193-217 (1989).
- 297 2 Schubert, R. Liposome preparation by detergent removal. *Methods Enzymol* **367**, 46-70  
298 (2003).
- 299 3 Patil, Y. P. & Jadhav, S. Novel methods for liposome preparation. *Chem Phys Lipids*  
300 **177**, 8-18 (2014).
- 301 4 Berger, N., Sachse, A., Bender, J., Schubert, R. & Brandl, M. Filter extrusion of  
302 liposomes using different devices: comparison of liposome size, encapsulation  
303 efficiency, and process characteristics. *Int J Pharm* **223**, 55-68 (2001).
- 304 5 Silva, R., Ferreira, H., Little, C. & Cavaco-Paulo, A. Effect of ultrasound parameters for  
305 unilamellar liposome preparation. *Ultrason Sonochem* **17**, 628-632 (2010).
- 306 6 Goormaghtigh, E. & Scarborough, G. A. Density-based separation of liposomes by  
307 glycerol gradient centrifugation. *Anal Biochem* **159**, 122-131 (1986).
- 308 7 Lundahl, P., Zeng, C. M., Lagerquist Hagglund, C., Gottschalk, I. & Greijer, E.  
309 Chromatographic approaches to liposomes, proteoliposomes and biomembrane  
310 vesicles. *J Chromatogr B Biomed Sci Appl* **722**, 103-120 (1999).
- 311 8 Stachowiak, J. C. *et al.* Unilamellar vesicle formation and encapsulation by microfluidic  
312 jetting. *Proc Natl Acad Sci U S A* **105**, 4697-4702 (2008).
- 313 9 van Swaay, D. & deMello, A. Microfluidic methods for forming liposomes. *Lab Chip* **13**,  
314 752-767 (2013).
- 315 10 Yang, Y. *et al.* Self-assembly of size-controlled liposomes on DNA nanotemplates. *Nat*  
316 *Chem* **8**, 476-483 (2016).
- 317 11 Zhang, Z., Yang, Y., Pincet, F., Llaguno, M. C. & Lin, C. X. Placing and shaping  
318 liposomes with reconfigurable DNA nanocages. *Nat Chem* **9**, 653-659 (2017).
- 319 12 Perrault, S. D. & Shih, W. M. Virus-Inspired Membrane Encapsulation of DNA  
320 Nanostructures To Achieve In Vivo Stability. *Acs Nano* **8**, 5132-5140 (2014).
- 321 13 Daniel, E. Equilibrium sedimentation of a polyelectrolyte in a density gradient of a low-  
322 molecular weight electrolyte. I. DNA in CsCl. *Biopolymers* **7**, 359-377 (1969).
- 323 14 Seeman, N. C. & Sleiman, H. F. DNA nanotechnology. *Nat Rev Mater* **3** (2018).
- 324 15 Kwak, M. & Herrmann, A. Nucleic acid amphiphiles: synthesis and self-assembled  
325 nanostructures. *Chem Soc Rev* **40**, 5745-5755 (2011).
- 326 16 Langecker, M., Arnaut, V., List, J. & Simmel, F. C. DNA nanostructures interacting with  
327 lipid bilayer membranes. *Acc Chem Res* **47**, 1807-1815 (2014).
- 328 17 Howorka, S. NANOTECHNOLOGY. Changing of the guard. *Science* **352**, 890-891  
329 (2016).
- 330 18 Shen, Q., Grome, M. W., Yang, Y. & Lin, C. Engineering Lipid Membranes with  
331 Programmable DNA Nanostructures. *Advanced Biosystems* **4**, 1900215 (2020).
- 332 19 He, Y., Chen, Y., Liu, H., Ribbe, A. E. & Mao, C. Self-assembly of hexagonal DNA two-  
333 dimensional (2D) arrays. *J Am Chem Soc* **127**, 12202-12203 (2005).
- 334 20 Mathieu, F. *et al.* Six-helix bundles designed from DNA. *Nano Lett* **5**, 661-665 (2005).
- 335 21 Du, X. Y., Zhong, X., Li, W., Li, H. & Gu, H. Z. Retraining and Optimizing DNA-  
336 Hydrolyzing Deoxyribozymes for Robust Single- and Multiple-Turnover Activities. *Acs*  
337 *Catal* **8**, 5996-6005 (2018).
- 338 22 Nguyen, N., Shteyn, V. & Melia, T. J. Sensing Membrane Curvature in Macroautophagy.  
339 *J Mol Biol* **429**, 457-472 (2017).
- 340 23 Nath, S. *et al.* Lipidation of the LC3/GABARAP family of autophagy proteins relies on a  
341 membrane-curvature-sensing domain in Atg3. *Nat Cell Biol* **16**, 415-424 (2014).

- 342 24 Weber, T. *et al.* SNAREpins: minimal machinery for membrane fusion. *Cell* **92**, 759-772  
343 (1998).
- 344 25 Jahn, R. & Scheller, R. H. SNAREs--engines for membrane fusion. *Nat Rev Mol Cell Biol*  
345 **7**, 631-643 (2006).
- 346 26 Sudhof, T. C. & Rothman, J. E. Membrane fusion: grappling with SNARE and SM  
347 proteins. *Science* **323**, 474-477 (2009).
- 348 27 Hernandez, J. M. *et al.* Membrane fusion intermediates via directional and full assembly  
349 of the SNARE complex. *Science* **336**, 1581-1584 (2012).
- 350 28 Hernandez, J. M., Kreutzberger, A. J., Kiessling, V., Tamm, L. K. & Jahn, R. Variable  
351 cooperativity in SNARE-mediated membrane fusion. *Proc Natl Acad Sci U S A* **111**,  
352 12037-12042 (2014).
- 353 29 Mostafavi, H. *et al.* Entropic forces drive self-organization and membrane fusion by  
354 SNARE proteins. *Proc Natl Acad Sci U S A* **114**, 5455-5460 (2017).
- 355 30 Ji, H. *et al.* Protein determinants of SNARE-mediated lipid mixing. *Biophys J* **99**, 553-560  
356 (2010).
- 357 31 Stratton, B. S. *et al.* Cholesterol Increases the Openness of SNARE-Mediated Flickering  
358 Fusion Pores. *Biophys J* **110**, 1538-1550 (2016).
- 359 32 Xu, W. M. *et al.* A Programmable DNA Origami Platform to Organize SNAREs for  
360 Membrane Fusion. *J Am Chem Soc* **138**, 4439-4447 (2016).
- 361 33 Zhang, B. *et al.* Synaptic vesicle size and number are regulated by a clathrin adaptor  
362 protein required for endocytosis. *Neuron* **21**, 1465-1475 (1998).
- 363 34 Qu, L., Akbergenova, Y., Hu, Y. & Schikorski, T. Synapse-to-synapse variation in mean  
364 synaptic vesicle size and its relationship with synaptic morphology and function. *J Comp*  
365 *Neurol* **514**, 343-352 (2009).
- 366 35 Czogalla, A. *et al.* Amphipathic DNA Origami Nanoparticles to Scaffold and Deform Lipid  
367 Membrane Vesicles. *Angew Chem Int Edit* **54**, 6501-6505 (2015).
- 368 36 Grome, M. W., Zhang, Z., Pincet, F. & Lin, C. X. Vesicle Tubulation with Self-Assembling  
369 DNA Nanosprings. *Angew Chem Int Edit* **57**, 5330-5334 (2018).
- 370 37 Franquelim, H. G., Khmelinskaia, A., Sobczak, J. P., Dietz, H. & Schwille, P. Membrane  
371 sculpting by curved DNA origami scaffolds. *Nat Commun* **9**, 811 (2018).

372
